# Supplementary material for: Effect of a short message service (SMS) intervention on adherence to a physiotherapist-prescribed home exercise program for people with knee osteoarthritis and obesity: protocol for the ADHERE randomised controlled trial
Source: Springer Nature journal article supplement (doi:10.1186/s12891-019-2801-z), 2019-09-14
Supplement: MOESM1 [file 17172478]

Additional file 1

Exercise barriers and the BCTs which were converted into individual SMS to address each barrier (mapped following the BCW framework using COM-B categories, TDF domains and intervention functions)

| <b>Barrier</b>                                                     | <b>COM-B category</b>    | <b>TDF Domain</b>                            | <b>Relevant Intervention function</b>   | <b>BCT used within the SMS intervention</b> |
|--------------------------------------------------------------------|--------------------------|----------------------------------------------|-----------------------------------------|---------------------------------------------|
| 1. Forgetfulness                                                   | Psychological capability | 10. Memory, attention and decision processes | Training                                | 8.3 Habit formation                         |
|                                                                    |                          |                                              | Environmental restructuring             | 7.1 Prompts/cues                            |
|                                                                    |                          |                                              | Enablement                              | 3.1 Social support (unspecified)            |
|                                                                    |                          |                                              |                                         | 10.9 Self-reward                            |
|                                                                    |                          |                                              |                                         | 1.2 Problem Solving                         |
|                                                                    |                          |                                              | 1.4 Action Planning                     |                                             |
| 2. Too tired                                                       | Psychological capability | 10. Memory, attention and decision processes | Education*                              | 5.1 Information about health consequences * |
|                                                                    |                          |                                              | Persuasion*                             | -                                           |
|                                                                    |                          |                                              | Training                                | -                                           |
|                                                                    | Reflective motivation*   | 8. Intentions                                | Environmental restructuring             | -                                           |
|                                                                    |                          |                                              | Enablement                              | 1.4 Action planning                         |
|                                                                    |                          |                                              |                                         | 15.4 Self talk                              |
|                                                                    |                          |                                              | 15.1 Verbal persuasion about capability |                                             |
|                                                                    |                          |                                              | 1.2 Problem Solving                     |                                             |
|                                                                    |                          |                                              | 8.7 Graded tasks                        |                                             |
| 3. Knee pain limiting perceived ability to exercise                | Reflective motivation    | 4. Beliefs about Capabilities                | Education                               | 5.1 Information about health consequences   |
|                                                                    |                          |                                              | Persuasion                              | -                                           |
|                                                                    |                          |                                              | Enablement                              | 8.7 Graded tasks                            |
|                                                                    |                          |                                              |                                         | 12.4 Distraction                            |
|                                                                    |                          |                                              |                                         | 15.4 Self talk                              |
|                                                                    |                          |                                              | 1.4 Action Planning                     |                                             |
|                                                                    |                          |                                              | 1.2 Problem Solving                     |                                             |
| 4. Concern exercise (causing) pain + Fear of damaging knee further | Reflective motivation    | 6. Beliefs about consequences                | Persuasion                              | 5.1 Information about health consequences   |
|                                                                    |                          |                                              | Enablement                              | 1.2 Problem Solving                         |
|                                                                    |                          |                                              |                                         | 1.4 Action planning                         |
| 5. Lack of improvement with exercises                              | Automatic motivation     | 7. Reinforcement                             | Training                                | 2.4 Self-monitoring outcome(s) of behaviour |
|                                                                    |                          |                                              |                                         | 2.2 Feedback on behaviour                   |

|                                                            |                       |                                         |                             |                                                 |
|------------------------------------------------------------|-----------------------|-----------------------------------------|-----------------------------|-------------------------------------------------|
|                                                            |                       |                                         |                             | 4.4 Behavioural experiments                     |
|                                                            |                       |                                         |                             | 4.1 Instruction on how to perform the behaviour |
|                                                            |                       |                                         | Environmental restructuring | -                                               |
| 6.                                                         | Automatic motivation  | 13. Emotion                             | Persuasion                  | 5.1 Information about health consequences       |
| Lack of enjoyment in exercise + Boredom with exercise      |                       |                                         | Enablement                  | 12.4 Distraction                                |
|                                                            |                       |                                         |                             | 15.4 Self talk                                  |
|                                                            |                       |                                         |                             | 10.9 Self-reward                                |
|                                                            |                       |                                         |                             | 12.1 Restructuring the physical environment     |
|                                                            |                       |                                         |                             | 1.2 Problem Solving                             |
|                                                            |                       |                                         |                             | 1.4 Action Planning                             |
|                                                            |                       |                                         |                             | 3.1 Social support (unspecified)                |
| 7.                                                         | Reflective motivation | 11. Environmental context and resources | Training                    | 4.1 Instruction on how to perform the behaviour |
| Conflict with routines + Lack of time                      |                       |                                         | Environmental restructuring | -                                               |
|                                                            |                       |                                         | Enablement                  | 3.1 Social support – unspecified                |
|                                                            |                       |                                         |                             | 1.2 Problem solving                             |
|                                                            |                       |                                         |                             | 1.4 Action Planning                             |
|                                                            |                       |                                         |                             | 15.3 Focus on past success                      |
|                                                            |                       |                                         |                             | 1.3 Goal setting (outcome)                      |
| 8.                                                         | Social Opportunity    | 12. Social influences                   | Environmental restructuring | -                                               |
| Family commitments + Increased social strain + Life events |                       |                                         | Enablement                  | 1.4 Action Planning                             |
|                                                            |                       |                                         |                             | 2.4 Self-monitoring of outcomes of behaviour    |
|                                                            |                       |                                         |                             | 15.1 Verbal persuasion about capability         |
|                                                            |                       |                                         |                             | 1.2 Problem solving                             |
|                                                            |                       |                                         |                             | 15.4 Self talk                                  |
|                                                            |                       |                                         |                             | 15.3 Focus on past success                      |
|                                                            |                       |                                         |                             | 1.1 Goal setting (behaviour)                    |

BCT= Behaviour change technique

BCW=Behaviour Change Wheel

Dash (-) indicates no BCT messages used in final SMS library from this intervention function
